# Supplementary material
Source: publisher figshare collection journal article supplement (https://sage.figshare.com/ndownloader/files/18027980)
Supplement: Supplementary file 1 [file 18027980]

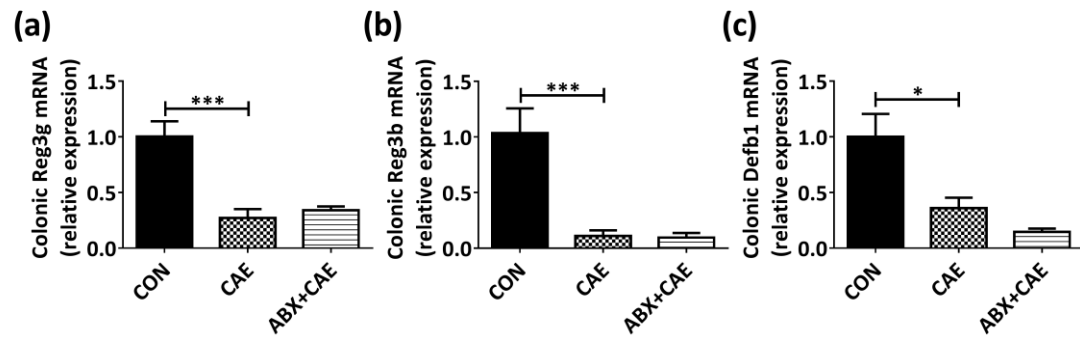

**Figure S1.** The chemical barrier-associated markers. Levels of colonic chemical barrier markers Reg3g (a), Reg3b (b) and Defb1 (c) were determined by qPCR. The results are shown as mean  $\pm$  SD,  $n \geq 3$ . \* $p < 0.05$ , \*\* $p < 0.01$  and \*\*\* $p < 0.001$  by one-way ANOVA followed by Dunnett's test.
